# Supplementary material
Source: PubMed Central journal article supplement (PMC3809781)
Supplement: JCI67604sd.pdf [file JCI67604sd.pdf]

**A**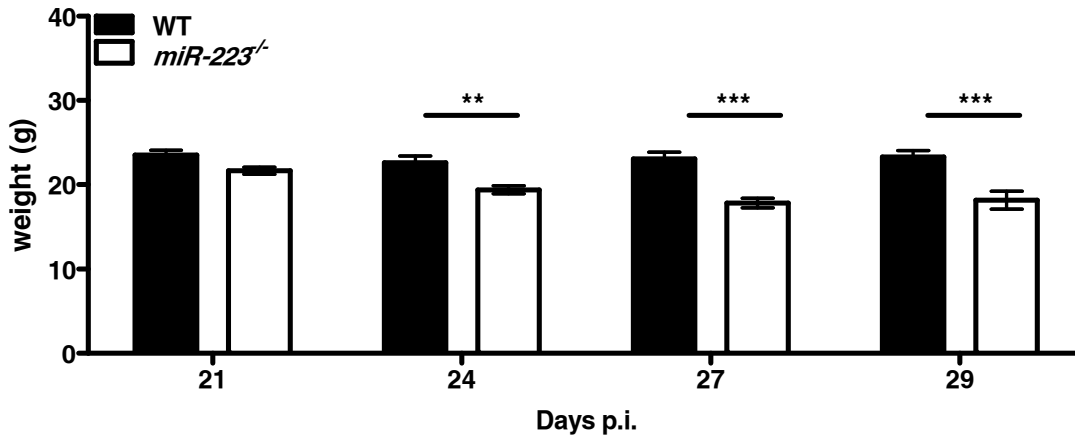**B**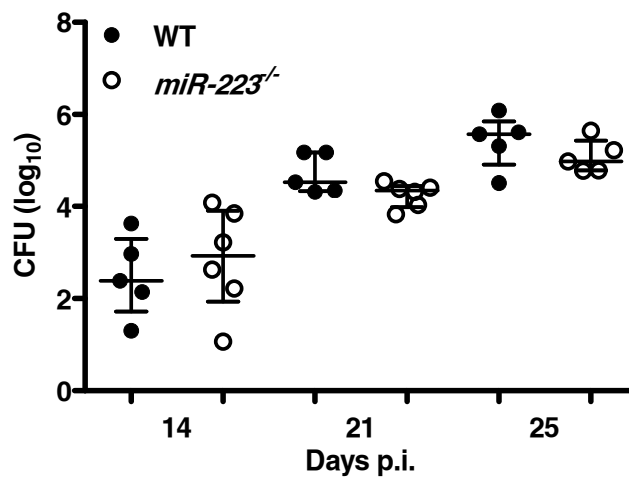**Figure S1**

Wasting disease in *miR-223*<sup>-/-</sup> mice infected with *Mtb* in absence of increased bacterial dissemination. **(A)** Body weights of C57BL/6 (WT) and *miR-223*<sup>-/-</sup> mice recorded at various time-points following infection. Data are presented as mean  $\pm$  SEM and results are representative of two independent experiments, ANOVA with Bonferroni post-test, (n=10). **(B)** Bacterial loads in spleens of WT and *miR-223*<sup>-/-</sup> mice. Data are presented as median  $\pm$  iQR and results are representative of three independent experiments (n=5-6). \*\*p<0.01, \*\*\*p<0.001.

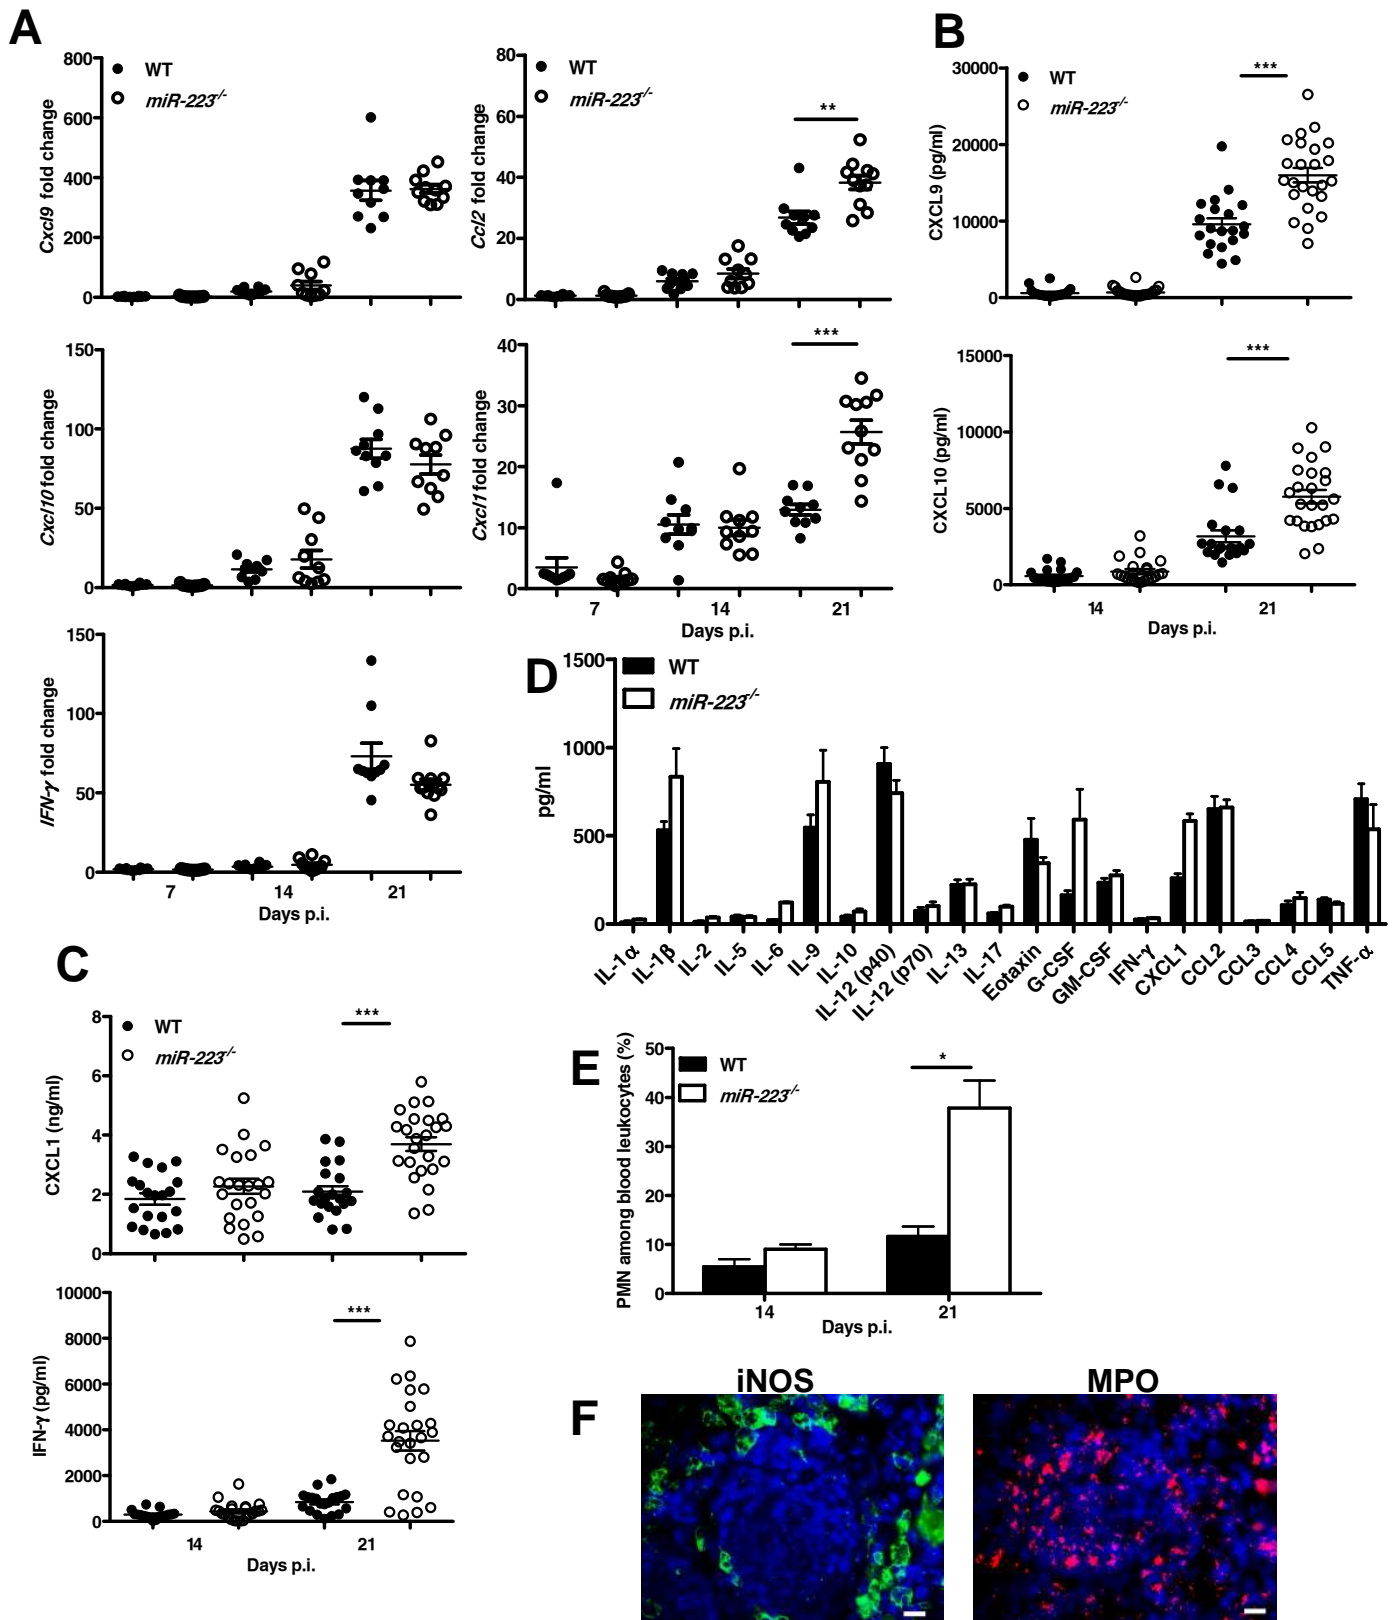

**Figure S2**

Cellular and molecular immune parameters in *Mtb*-infected C57BL/6 (WT) and *miR-223*<sup>-/-</sup> mice. **(A)** qRT-PCR of chemokine and cytokine genes in respiratory parenchyma. *Gapd* was used as reference gene and data were normalized to uninfected mice. Data are presented as mean  $\pm$  SEM and are representative of two independent experiments, Student's t-test ( $n=9-11$ ). **(B,C)** Protein concentrations of Cxcl9, Cxcl10, Cxcl1 and IFN- $\gamma$  were measured using multiplex immunoassay in lung homogenates collected at 21 days p.i. Data are presented as mean  $\pm$  SEM and are pooled from four independent experiments, ANOVA with Bonferroni post-test ( $n=18-24$ ). **(D)** Serum concentration of immune mediators. Data are presented as mean  $\pm$  SEM ( $n=5-6$ ). **(E)** Neutrophils were enumerated in blood smears at 21 days p.i. Data are presented as mean  $\pm$  SEM and are representative of two independent experiments, Student t-test ( $n=3$ ). **(F)** Immunohistochemistry for inducible NOS (iNOS) and myeloperoxidase (MPO) in lung tissue of *miR-223*<sup>-/-</sup> mice at 25 days p.i. Pictures are representative of two independent experiments ( $n=3$ ). Scale bar: 10  $\mu$ m. \*  $p<0.05$ , \*\* $p<0.01$ , \*\*\* $p<0.001$ .

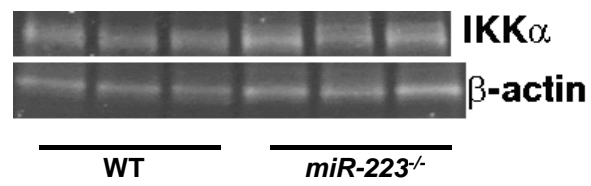

**Figure S3**

Western blot for total IKK $\alpha$  and  $\beta$ -actin in lung homogenates from C57BL/6 (WT) and *miR-223*<sup>-/-</sup> mice at 21 days p.i. Data are representative of two independent experiments (n=5).

## Flow cytometry experiments

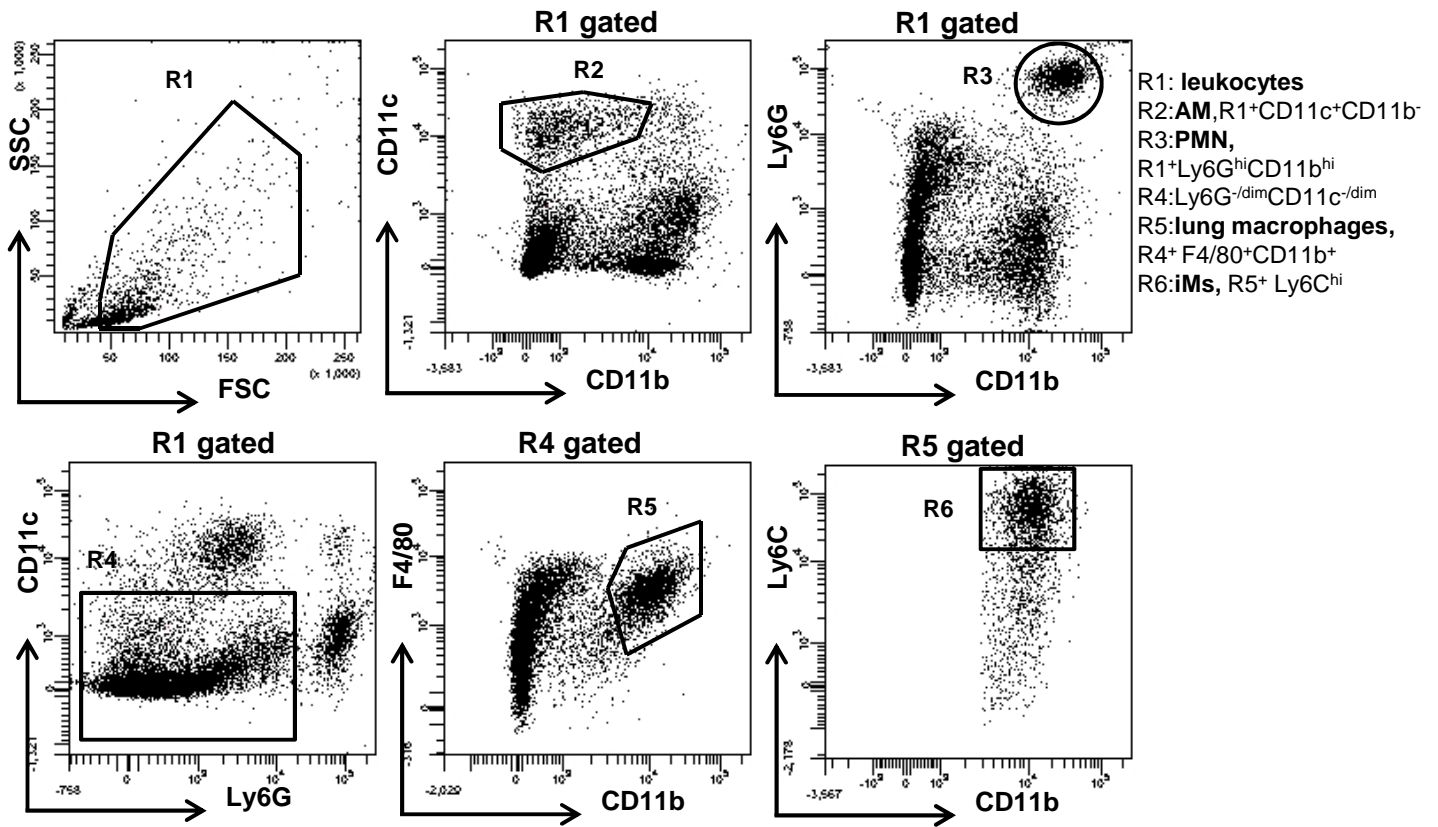

## Sorting experiments

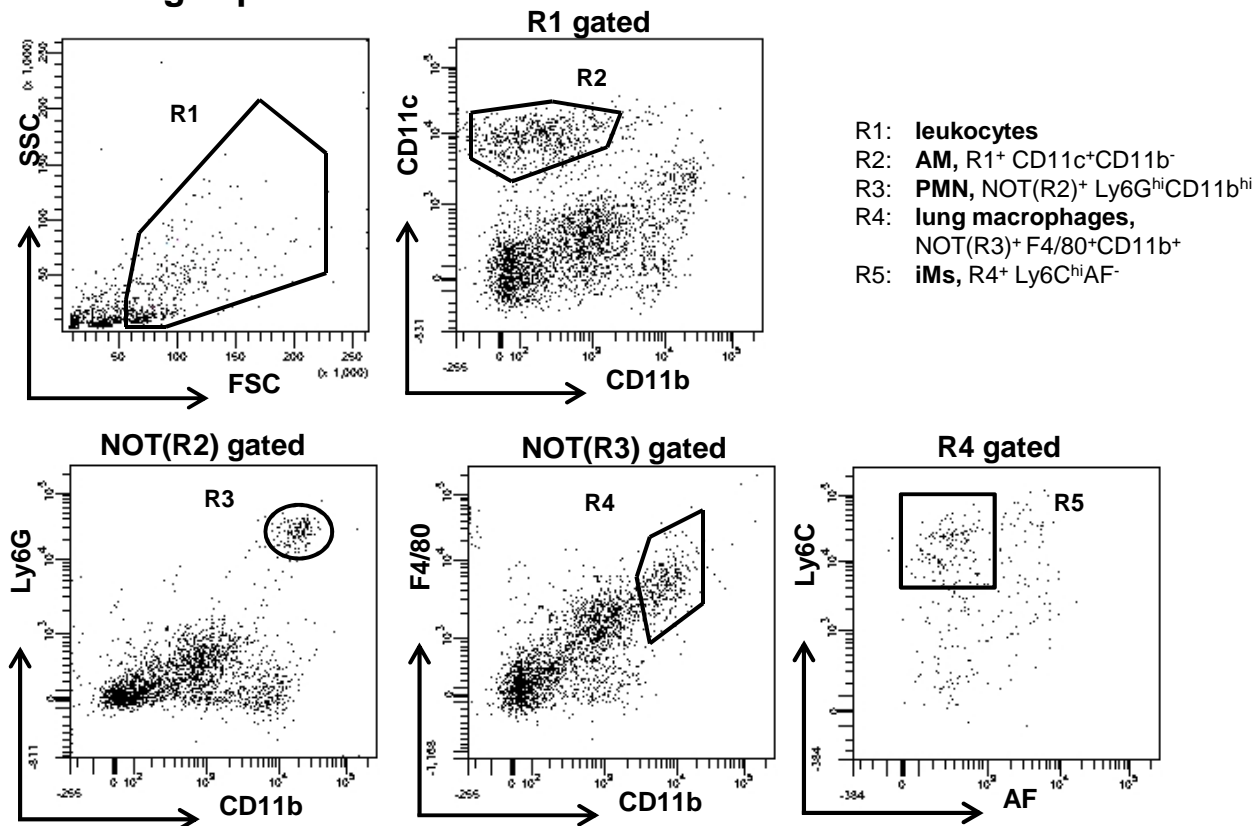

**Figure S4**

Gating strategies applied for **(A)** identification of innate cell populations: AMs [leukocyte gate (R1)<sup>+</sup> CD11c<sup>hi</sup>CD11b<sup>-</sup>], PMNs [leukocyte gate (R1)<sup>+</sup> Ly6G<sup>hi</sup>CD11b<sup>hi</sup>], lung macrophages [leukocyte gate (R1)<sup>+</sup> CD11c<sup>-</sup>Ly6G<sup>-</sup> F4/80<sup>+</sup>CD11b<sup>+</sup>], iMs [leukocyte gate (R1)<sup>+</sup> CD11c<sup>-</sup>Ly6G<sup>-</sup> F4/80<sup>+</sup>CD11b<sup>+</sup> Ly6C<sup>hi</sup>] and **(B)** sorting of innate cell populations: AM [leukocyte gate (R1)<sup>+</sup> CD11c<sup>hi</sup>CD11b<sup>-</sup>], PMNs [leukocyte gate (R1)<sup>+</sup> NOT(AM)<sup>+</sup> Ly6G<sup>hi</sup>CD11b<sup>hi</sup>], lung macrophages [leukocyte gate (R1)<sup>+</sup> NOT(AM)<sup>+</sup> NOT(PMN)<sup>+</sup> CD11c<sup>-</sup>Ly6G<sup>-</sup> F4/80<sup>+</sup>CD11b<sup>+</sup>], iMs [leukocyte gate (R1)<sup>+</sup> NOT(AM)<sup>+</sup> NOT(PMN)<sup>+</sup> CD11c<sup>-</sup>Ly6G<sup>-</sup> F4/80<sup>+</sup>CD11b<sup>+</sup> Ly6C<sup>hi</sup>].

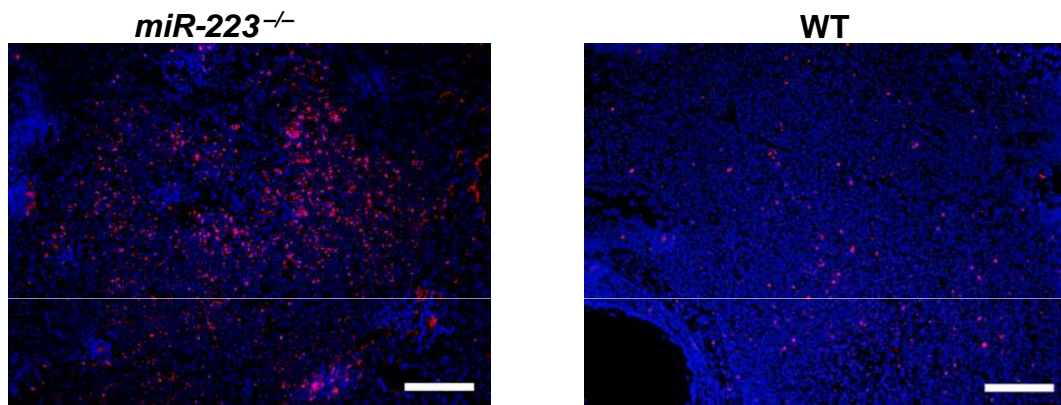

**Figure S5**

Cell death events in lungs of WT (C57BL/6) and *miR-223*<sup>-/-</sup> mice during TB. Lung tissue collected at day 21 p.i. was TUNEL-stained (Roche) to evaluate the proportion of apoptotic cells in situ. Pictures are representative of two independent experiments (n=5). Scale bar: 100  $\mu$ m.

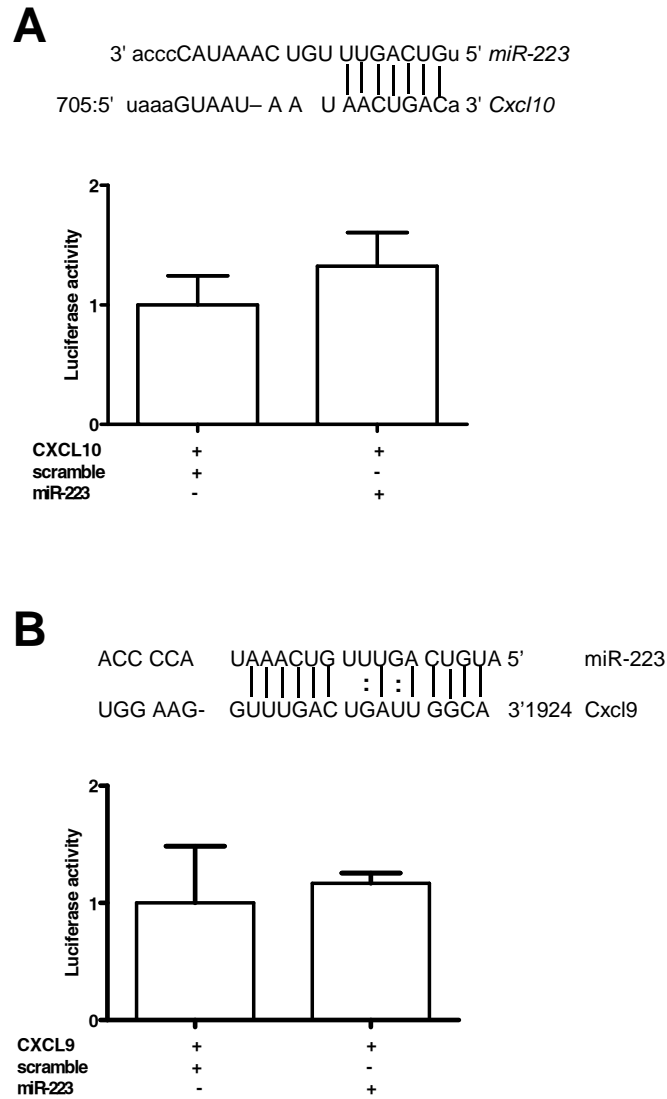

**Figure S6**

MiR-223 does not target the chemokines Cxcl9 and Cxcl10. **(A)** Luciferase activity of HeLa cells transfected with 3'UTR of *cxcl9* plus scramble and miR-223 mimics. **(B)** Luciferase activity of HeLa cells transfected with 3'UTR of *cxcl10* plus scramble and miR-223 mimics. Data are presented as mean  $\pm$  SEM and results are representative of three experiments with three replicates each.

**A**

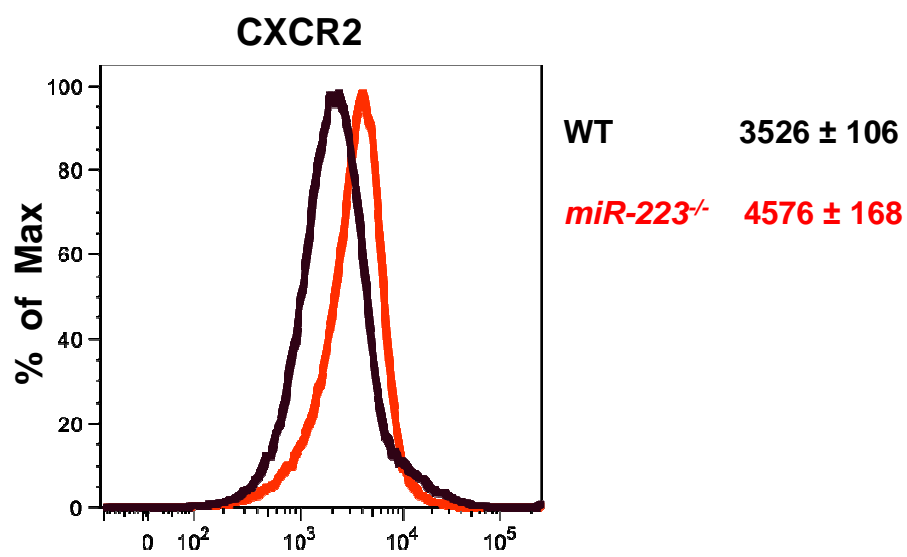

**Figure S7**

CXCR2 cell surface expression on PMNs. PMNs from C57BL/6 (WT) and *miR-223*<sup>-/-</sup> mice were purified from the bone marrow and stained for CXCR2 followed by analysis by FACS. Numbers represent the mean fluorescence  $\pm$  SEM (n=4) Data are representative of two experiments with four replicates each.

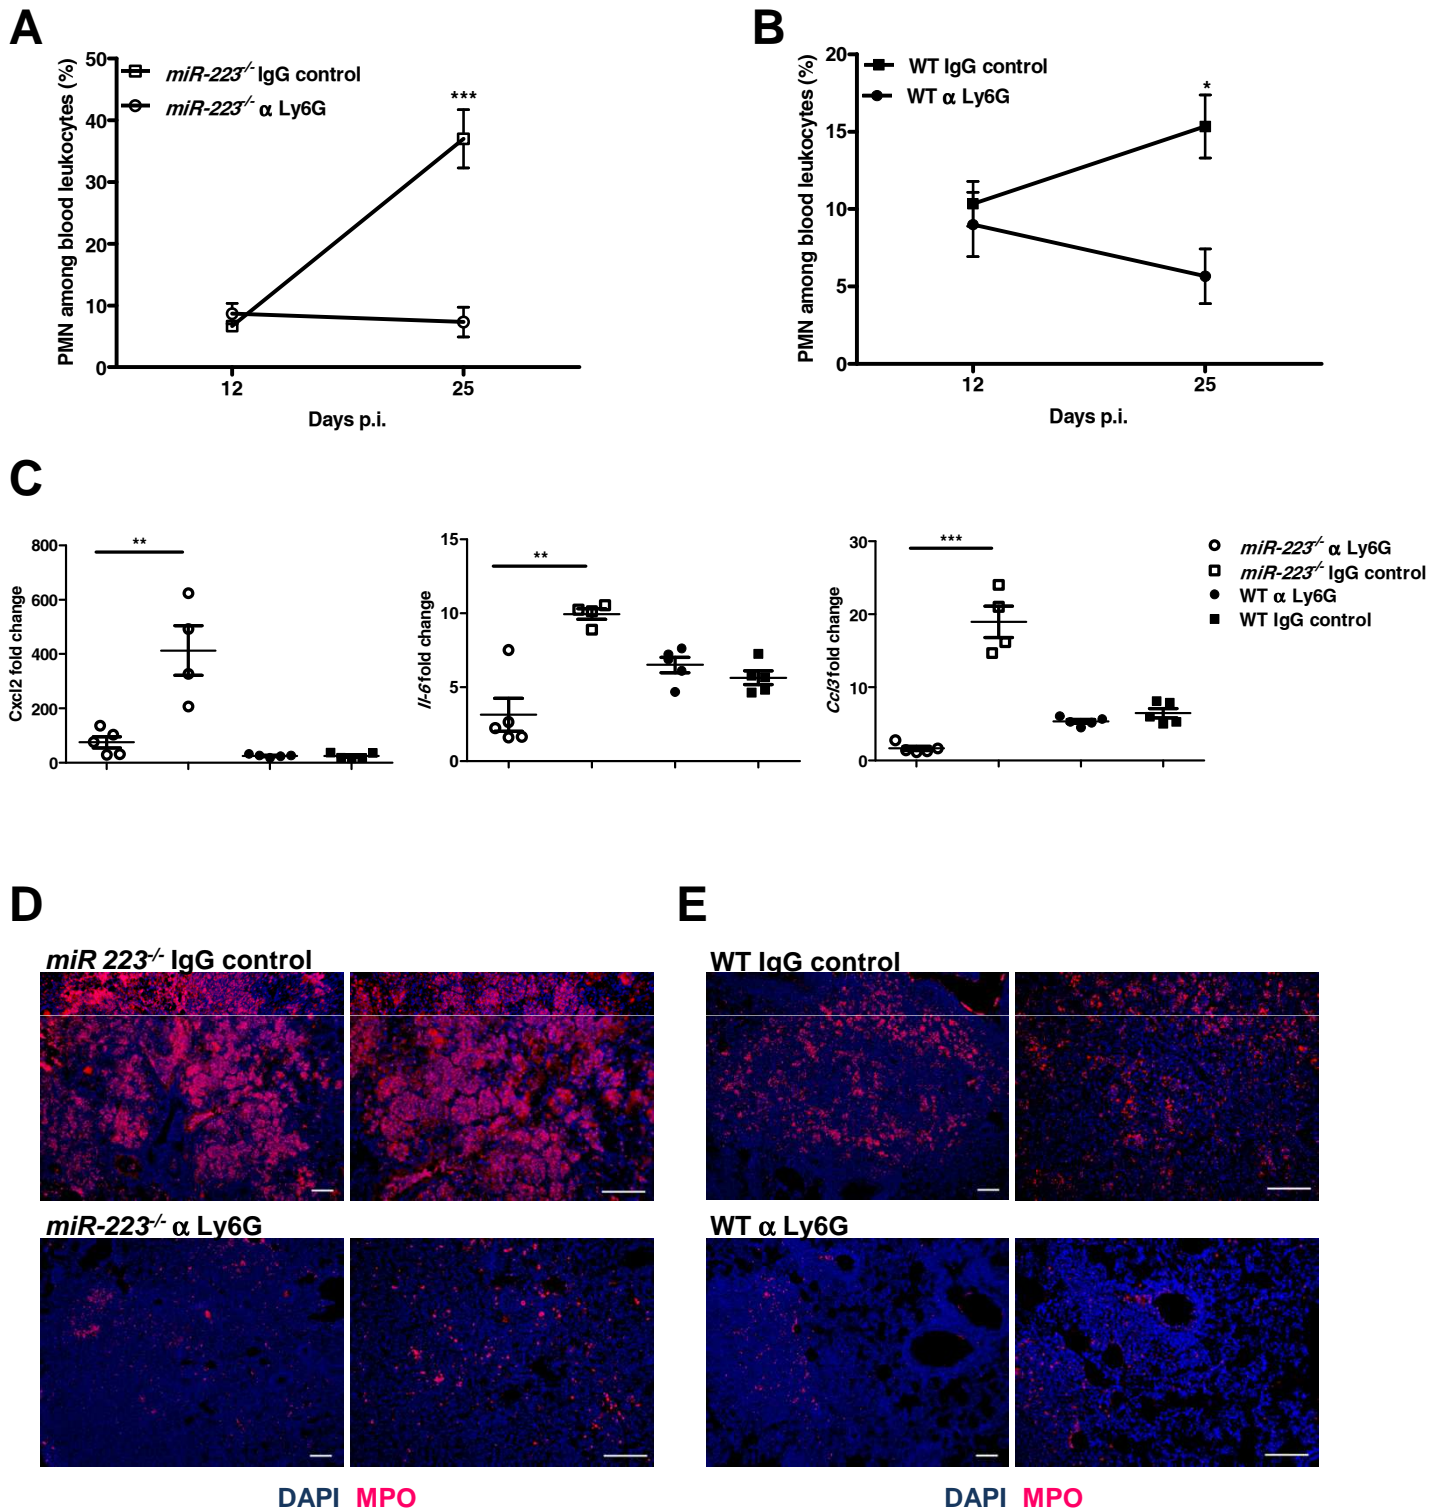

**Figure S8**

Treatment with mAb against Ly6G affects the expression of genes targeted by *miR-223* during TB. **(A)** *MiR-223*<sup>-/-</sup> mice were treated with mAb against Ly6G (PMN-specific) or with control IgG. PMN frequency was evaluated by analysis of blood smears at indicated times p.i. Data are presented as mean ± SEM and are representative of two independent experiments, ANOVA with Bonferroni post-test (n=3). **(B)** C57BL/6 (WT) mice were treated with mAb against Ly6G (PMN specific) or with control IgG. PMN frequency was evaluated by analysis of blood smears at indicated times p.i. Data are presented as mean ± SEM, ANOVA with Bonferroni post-test (n=3). **(C)** *Cxcl2*, *Il-6* and *Ccl3* were quantified using qRT-PCR in lung tissue collected at 25 days p.i. from C57BL/6 (WT) and *miR-223*<sup>-/-</sup> mice treated as indicated. U6 snRNA was used as reference gene and data were normalized to uninfected mice. Data are presented as mean ± SEM and are representative of two experiments (n=3–5). **(D, E)** Immunohistochemistry for neutrophils and inflammatory monocytes/macrophages (MPO) in the lung tissue collected at day 25 p.i. Data are representative of two independent experiment (n=5). Scale bar 100 μm. \* p<0.05, \*\*p<0.01, \*\*\*p<0.001.



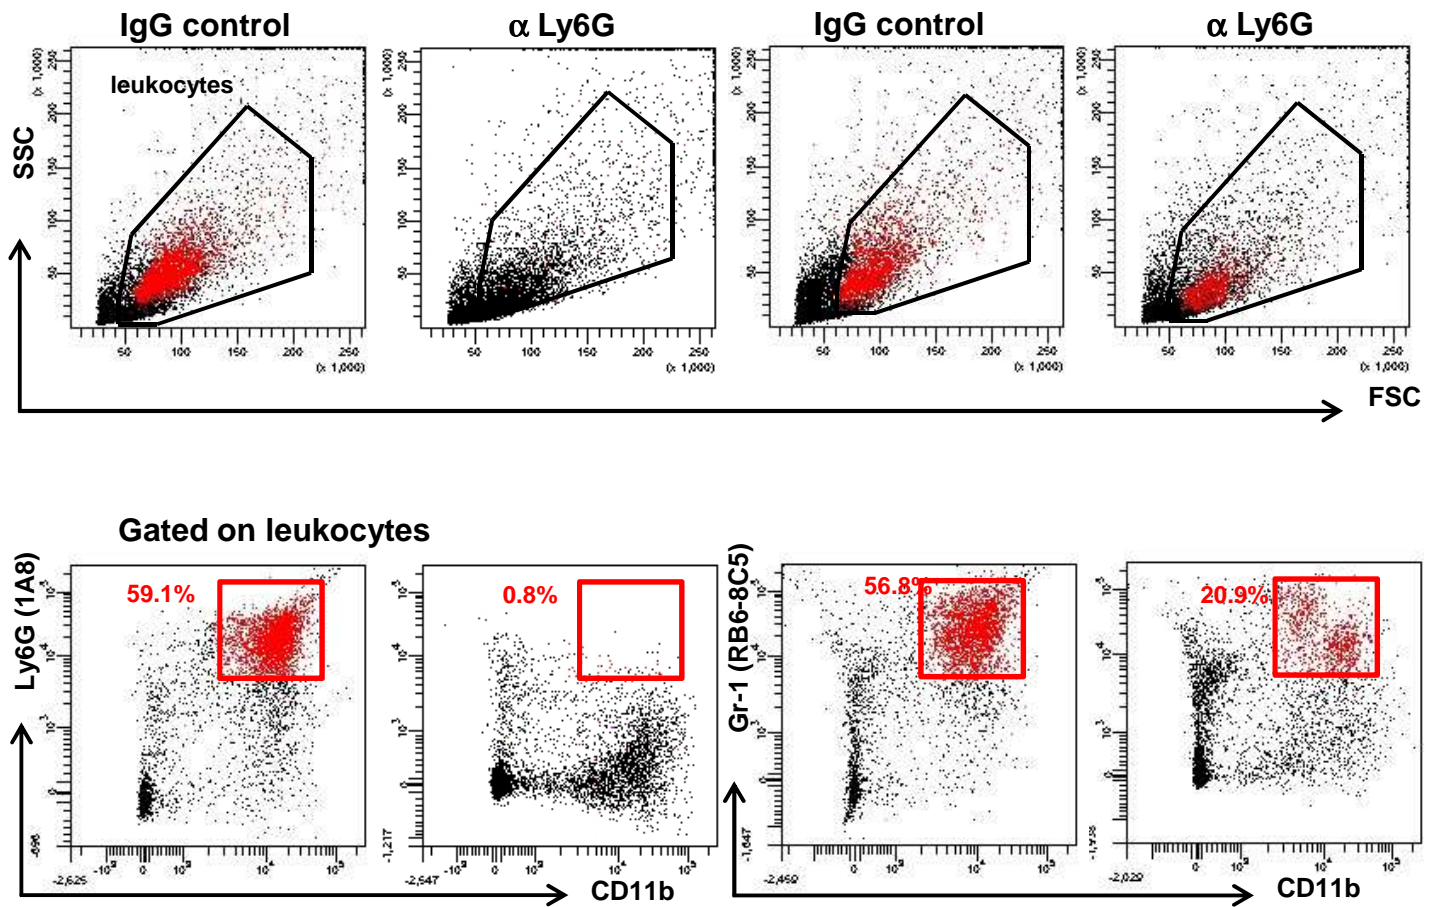

**Figure S9**

Flow cytometric analysis of lung cells upon PMN-specific treatment. Mice were treated with control antibody (control) or PMN-specific Ly6G mAb (1A8) and consequently lung tissue was processed for flow cytometric investigations. Representative dot plots indicate the effect of the treatment on lung PMN frequency (n=5). Data are representative of two experiments.

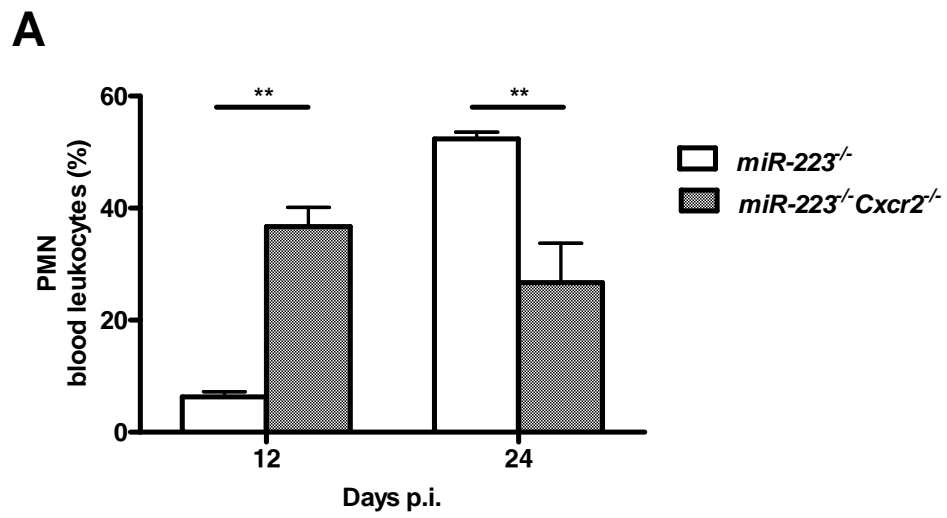

**Figure S10**

Frequencies of blood PMNs during TB in *miR-223*<sup>-/-</sup> and *Cxcr2*<sup>-/-</sup> *miR-223*<sup>-/-</sup> mice. Blood was processed for haematologic analysis at 12 and 24 days p.i. Data are presented as mean ± SEM and are from one experiment. ANOVA with Bonferroni post-test (n=3). \*\*p<0.01.

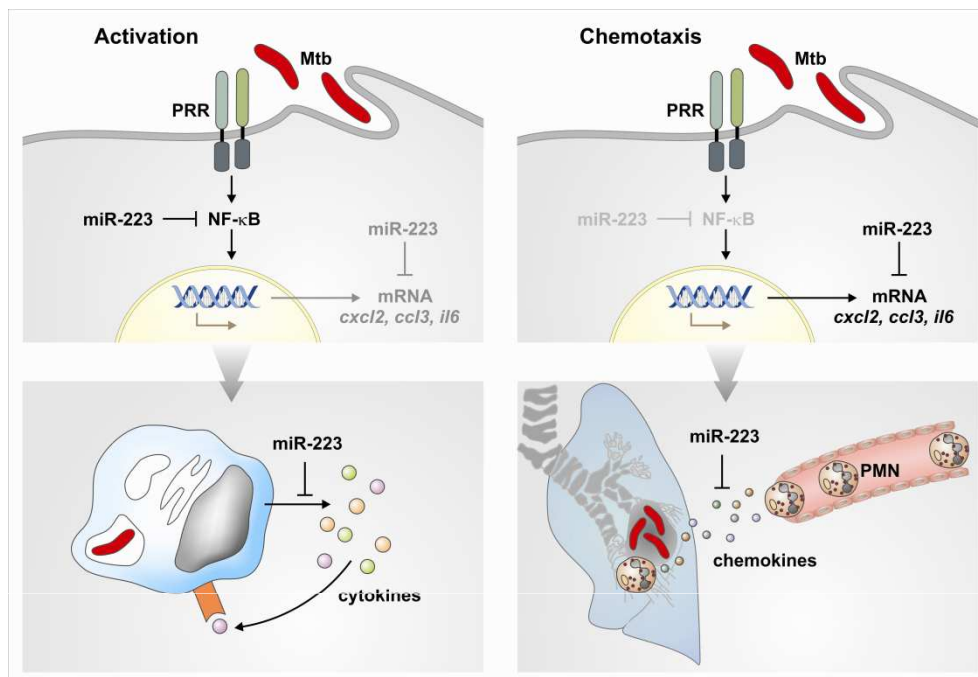

### Figure S11

Proposed model for miR-223 activity during *Mtb* infection. MiR-223 fine-tunes myeloid cell activation during *Mtb* infection by modulating NF- $\kappa$ B activation, and thus in mononuclear cells, primarily controls gene transcription. In addition miR-223 targets Il-6 and the chemokines Cxcl2 and Ccl3 post-transcriptionally: in this way miR-223 affects PMN dynamics at the site of mycobacterial infection.

| Primary sequence name | Fold change | <i>P</i> value |
|-----------------------|-------------|----------------|
| hsa-miR-335*          | 4.58655     | 0.00007        |
| hsa-miR-197           | 2.39823     | 0.00007        |
| hsa-miR-223           | 1.71582     | 0.00192        |
| hsa-miR-625           | 1.54236     | 0.03436        |
| hsa-miR-22            | 1.47565     | 0.04672        |
| hsa-miR-629           | 1.35915     | 0.04027        |
| hsa-miR-451           | -1.03788    | 0.045936       |
| hsa-miR-148b          | -1.49055    | 0.04583        |
| hsa-miR-19b           | -1.61769    | 0.00312        |
| hsa-miR-501-3p        | -1.73841    | 0.0032         |
| hsa-miR-940           | -1.83695    | 0.00956        |
| hsa-miR-296-5p        | -1.87385    | 0.00145        |
| hsa-miR-33b*          | -2.07159    | 0.03662        |
| hsa-miR-92b           | -2.83205    | 0.01852        |
| hsa-miR-744           | -3.28177    | 0.00065        |
| hsa-miR-1238          | -4.07883    | 0.00032        |

**Table S1**

Differentially regulated mRNAs in whole blood of active TB patients compared to healthy latent TB-infected individuals.

| Fold change | P value   | Primary sequence name | Accession #  | miR-223 predicted target |
|-------------|-----------|-----------------------|--------------|--------------------------|
| 74.92       | 2.15 E-07 | Hnrn                  | NM_133698    | N                        |
| 74.40       | 1.67 E-07 | Serpinb3b             | NM_198680    | Y                        |
| 38.75       | 0.00007   | Myot                  | NM_021484    | N                        |
| 37.34       | 7.84 E-10 | Sprri5                | NM_026822    | N                        |
| 36.25       | 4.85 E-08 | Krt2-4                | NM_008475    | N                        |
| 35.78       | 0.00003   | Crisp1                | NM_009638    | N                        |
| 33.76       | 1.44 E-07 | Sprr3                 | NM_011478    | N                        |
| 31.17       | 5.86 E-10 | Calm4                 | NM_020036    | N                        |
| 30.72       | 9.08 E-10 | Il1f6                 | NM_019450    | N                        |
| 27.79       | 1.71 E-09 | Serpinb3a             | NM_009126    | N                        |
| 27.70       | 5.72 E-07 | Krt1-13               | NM_010662    | N                        |
| 25.47       | 9.35 E-07 | Myh4                  | NM_010855    | N                        |
| 25.04       | 1.48 E-09 | Dmkn                  | NM_172899    | Y                        |
| 23.97       | 1.51 E-09 | Asah3                 | NM_175731    | N                        |
| 22.16       | 2.90 E-11 | Mt4                   | NM_008631    | N                        |
| 21.79       | 0.00021   | Serpinb5              | NM_009257    | N                        |
| 21.46       | 0.00045   | Klk7                  | NM_011872    | Y                        |
| 21.21       | 1.98 E-09 | Serpinb3c             | NM_201363    | Y                        |
| 19.88       | 2.47 E-09 | Hnrn                  | NM_133698    | N                        |
| 18.34       | 6.57 E-08 | Pkp1                  | NM_019645    | Y                        |
| 15.33       | 0.00003   | Gpr87                 | NM_032399    | N                        |
| 15.26       | 1.56 E-09 | Serpinb3a             | NM_009126    | N                        |
| 14.01       | 0.00098   | Sprri1                | NM_033175    | N                        |
| 14.00       | 6.97 E-09 | Myh8                  | NM_177369    | N                        |
| 12.55       | 1.52 E-12 | Sprri7                | NM_027137    | N                        |
| 12.16       | 1.19 E-07 | Dsc1                  | NM_013504    | N                        |
| 12.10       | 8.52 E-06 | Pla2g4e               | NM_177845    | N                        |
| 11.41       | 1.09 E-07 | Myh2                  | NM_144961    | N                        |
| 10.88       | 8.35 E-07 | Pvalb                 | NM_013645    | N                        |
| 9.79        | 1.22 E-12 | Sprri9                | NM_026335    | N                        |
| 9.48        | 3.85 E-12 | Sim2                  | NM_011377    | N                        |
| 7.09        | 7.40 E-07 | Jsrp1                 | NM_028001    | N                        |
| 6.69        | 2.99 E-09 | Alox12b               | NM_009659    | N                        |
| 6.56        | 6.63 E-09 | Il1f5                 | NM_019451    | Y                        |
| 6.44        | 0.00028   | Them5                 | NM_025416    | N                        |
| 5.32        | 0.00023   | Gsdm1                 | NM_021347    | N                        |
| 5.29        | 3.74 E-12 | Tbx15                 | NM_009323    | Y                        |
| 5.10        | 1.32 E-29 | Cyp1a1                | NM_009992    | N                        |
| 4.67        | 0.00011   | Casq1                 | NM_009813    | N                        |
| 4.45        | 0.00002   | Hsd17b2               | NM_008290    | N                        |
| 4.16        | 0.00011   | S100a15               | NM_199422    | N                        |
| 3.40        | 0.0008    | Defb6                 | NM_054074    | N                        |
| 3.39        | 0         | Ces1                  | NM_021456    | Y                        |
| 3.36        | 0         | Ces1                  | NM_021456    | Y                        |
| 3.33        | 0.00074   | Smtnl1                | NM_024230    | N                        |
| 3.11        | 0.00029   | Cdsn                  | NM_001008424 | N                        |
| 3.10        | 1.44 E-07 | Mybph                 | NM_016749    | N                        |
| 2.56        | 0.00046   | Prom2                 | NM_138750    | N                        |
| 2.26        | 0.00002   | Cpa4                  | NM_027926    | Y                        |
| 2.14        | 0.00016   | Pdk4                  | NM_013743    | Y                        |
| 2.10        | 2.43 E-10 | Il1f9                 | NM_153511    | N                        |
| 2.03        | 0.00004   | Myom2                 | NM_008664    | N                        |

**Table S2**

List of upregulated genes in lung tissue of *miR-223*<sup>-/-</sup> mice at day 14 post-*Mtb*-infection.

| Fold change | P value   | Primary sequence name | Accession #  | miR-223 predicted target |
|-------------|-----------|-----------------------|--------------|--------------------------|
| 9.93        | 2.36 E-06 | Cxcl2                 | NM_009140    | Y                        |
| 7.56        | 0.00009   | Olf633                | NM_146354    | N                        |
| 7.13        | 5.86 E-11 | Retnlb                | NM_023881    | N                        |
| 6.96        | 7.41 E-23 | Il1f9                 | NM_153511    | N                        |
| 6.90        | 5.54 E-42 | Csf3                  | NM_009971    | Y                        |
| 6.70        | 2.84 E-11 | Ccl3                  | NM_011337    | Y                        |
| 6.60        | 1.55 E-10 | Olfm4                 | NM_001030294 | N                        |
| 6.08        | 6.27 E-14 | Mmp10                 | NM_019471    | N                        |
| 5.82        | 0.00042   | Myh4                  | NM_010855    | N                        |
| 5.78        | 1.46 E-13 | Il11                  | NM_008350    | N                        |
| 5.42        | 9.86 E-17 | Gzmf                  | NM_010374    | N                        |
| 5.40        | 3.66 E-11 | Trem1                 | NM_021406    | Y                        |
| 5.40        | 1.40 E-12 | Olfm4                 | NM_001030294 | N                        |
| 5.25        | 2.94 E-11 | Ccl4                  | NM_013652    | N                        |
| 5.18        | 3.57 E-08 | Orm2                  | NM_011016    | N                        |
| 4.64        | 1.19 E-06 | Orm1                  | NM_008768    | N                        |
| 4.33        | 3.91 E-06 | Grem1                 | NM_011824    | Y                        |
| 4.33        | 3.16 E-10 | Il6                   | NM_031168    | Y                        |
| 4.14        | 2.20 E-07 | BC055107              | NM_183187    | N                        |
| 4.02        | 0.00039   | Pou5f1                | NM_013633    | N                        |
| 3.95        | 1.84 E-12 | Scrg1                 | NM_009136    | N                        |
| 3.88        | 9.31 E-10 | Dmbt1                 | NM_007769    | N                        |
| 3.87        | 0.00003   | lpf1                  | NM_008814    | N                        |
| 3.87        | 5.66 E-15 | Tnfrsf23              | NM_024290    | N                        |
| 3.85        | 8.60 E-36 | Hspa1a                | NM_010479    | Y                        |
| 3.82        | 2.12 E-14 | Hspa1a                | NM_010479    | Y                        |
| 3.79        | 8.21 E-10 | Gpr109a               | NM_030701    | N                        |
| 3.69        | 4.82 E-07 | Il1f6                 | NM_019450    | N                        |
| 3.64        | 5.35 E-27 | Arg1                  | NM_007482    | N                        |
| 3.62        | 3.71 E-07 | Ms4a3                 | NM_133246    | N                        |
| 3.55        | 0.00078   | Stfa3                 | NM_025288    | N                        |
| 3.49        | 1.20 E-06 | Klra17                | NM_133203    | N                        |
| 3.43        | 0         | Il22                  | NM_016971    | N                        |
| 3.40        | 0         | Orm3                  | NM_013623    | N                        |
| 3.30        | 7.89 E-06 | Gm1960                | NM_203320    | N                        |
| 3.29        | 0         | Hspa1a                | NM_010479    | Y                        |
| 3.29        | 3.77 E-24 | Etos1                 | NM_053258    | N                        |
| 3.29        | 2.94 E-11 | Stfa1                 | NM_001001332 | N                        |
| 3.24        | 0         | Il22                  | NM_016971    | N                        |
| 3.20        | 0.00008   | Stfa1                 | NM_001001332 | N                        |
| 3.17        | 0.0001    | Sfn3                  | NM_011409    | N                        |
| 3.14        | 0.00005   | Serpina3m             | NM_009253    | N                        |
| 3.06        | 6.23 E-08 | Ceacam10              | NM_007675    | Y                        |
| 3.01        | 0.00009   | Akr1c14               | NM_134072    | N                        |
| 3.00        | 1.16 E-35 | Ngp                   | NM_008694    | N                        |
| 2.97        | 2.14 E-11 | Saa1                  | NM_009117    | N                        |
| 2.96        | 0.00008   | Stfa1                 | NM_001001332 | N                        |
| 2.95        | 1.75E-07  | Saa2                  | NM_011314    | N                        |
| 2.86        | 0.00021   | Il1rn                 | NM_031167    | N                        |
| 2.84        | 0.00003   | Retnla                | NM_020509    | N                        |
| 2.79        | 0.00006   | Retnla                | NM_020509    | N                        |
| 2.79        | 1.39 E-20 | Trem1                 | NM_021406    | Y                        |
| 2.75        | 0.00016   | Mt2                   | NM_008630    | Y                        |
| 2.69        | 0.00048   | Onecut2               | NM_194268    | Y                        |
| 2.68        | 1.75 E-14 | Fosl1                 | NM_010235    | N                        |
| 2.68        | 1.06 E-22 | Slpi                  | NM_011414    | N                        |
| 2.66        | 0.00001   | Itgb2l                | NM_008405    | N                        |
| 2.61        | 1.26 E-18 | Ctsg                  | NM_007800    | N                        |
| 2.57        | 0.00002   | Lphn3                 | NM_198702    | Y                        |
| 2.53        | 1.35 E-07 | Cd14                  | NM_009841    | N                        |
| 2.53        | 0         | Rhov                  | NM_145530    | Y                        |
| 2.50        | 9.72 E-12 | Pram1                 | NM_001002842 | N                        |
| 2.47        | 4.55 E-07 | Sectm1                | NM_026907    | N                        |
| 2.47        | 6.47 E-24 | Hspa1a                | NM_010479    | Y                        |
| 2.47        | 2.17 E-10 | Osm                   | NM_001013365 | Y                        |

|      |            |           |              |   |
|------|------------|-----------|--------------|---|
| 2.46 | 3.76 E-18  | Mxd1      | NM_010751    | Y |
| 2.41 | 4.26 E-06  | Ptprn     | NM_008985    | N |
| 2.41 | 3.63 E-09  | Map3k6    | NM_016693    | N |
| 2.40 | 9.80 E-08  | Saa3      | NM_011315    | N |
| 2.40 | 0.00006    | Syt8      | NM_018802    | N |
| 2.37 | 0.00005    | Saa4      | NM_011316    | N |
| 2.36 | 4.43 E-08  | Map3k6    | NM_016693    | N |
| 2.36 | 0.000233   | Ccl2      | NM_011333    | Y |
| 2.36 | 0.00038    | Pappa     | NM_021362    | Y |
| 2.34 | 1.90 E-07  | F13a1     | NM_028784    | N |
| 2.34 | 1.67 E-07  | Ptx3      | NM_008987    | N |
| 2.33 | 2.38 E-10  | Serpina3n | NM_009252    | Y |
| 2.28 | 4.67 E-22  | Tlr6      | NM_011604    | Y |
| 2.27 | 1.61 E-10  | Saa1      | NM_009117    | N |
| 2.24 | 2.78 E-06  | Ltf       | NM_008522    | N |
| 2.24 | 0.00002    | Ltf       | NM_008522    | N |
| 2.23 | 3.97 E-10  | Pdzd3     | NM_133226    | N |
| 2.23 | 1.24 E-04  | Cxcl9     | NM_008599    | Y |
| 2.22 | 2.78 E-29  | G0s2      | NM_008059    | Y |
| 2.21 | 0.0008751  | Cxcl10    | NM_021274    | Y |
| 2.20 | 0.0001     | Inhba     | NM_008380    | N |
| 2.19 | 1.66 E-09  | Bcl2l11   | NM_207680    | Y |
| 2.19 | 0.00007    | Prtn3     | NM_011178    | N |
| 2.18 | 0.00041    | Acsl6     | NM_144823    | N |
| 2.17 | 6.11 E-20  | Osm       | NM_001013365 | Y |
| 2.16 | 0.00016    | MGC58177  | NM_198666    | N |
| 2.16 | 0.00031    | Fpr1      | NM_013521    | N |
| 2.15 | 3.32 E-08  | Aldh1a3   | NM_053080    | Y |
| 2.14 | 1.24 E-11  | Arg2      | NM_009705    | N |
| 2.13 | 5.60 E-06  | Ifng      | NM_008337    | Y |
| 2.13 | 0.00081    | Serpina2  | NM_011111    | N |
| 2.13 | 9.66 E-07  | Pla1a     | NM_134102    | N |
| 2.13 | 4.46 E-06  | Mybph     | NM_016749    | N |
| 2.12 | 1.91 E-09  | Sult1a1   | NM_133670    | Y |
| 2.12 | 5.85 E-07  | Mpo       | NM_010824    | N |
| 2.10 | 1.05 E-09  | Sectm1    | NM_026907    | N |
| 2.10 | 0.00022475 | Cxcl1     | NM_008176    | Y |
| 2.10 | 0.00012    | Speer4a   | NM_029376    | N |
| 2.09 | 2.05 E-30  | Ltb4r1    | NM_008519    | N |
| 2.09 | 1.35 E-25  | Has1      | NM_008215    | N |
| 2.09 | 3.59 E-07  | Timp1     | NM_011593    | N |
| 2.08 | 4.42 E-35  | Wdfy1     | NM_027057    | N |
| 2.07 | 9.84 E-06  | Sphk1     | NM_025367    | N |
| 2.05 | 0.00028    | Ces6      | NM_133960    | N |
| 2.05 | 1.74 E-06  | Gda       | NM_010266    | N |
| 2.05 | 1.25 E-12  | Slc5a9    | NM_145551    | N |
| 2.05 | 8.41 E-07  | Speer4d   | NM_025759    | N |
| 2.05 | 5.59 E-06  | Fkbp5     | NM_010220    | Y |
| 2.04 | 0.00003    | Cxcl13    | NM_018866    | N |
| 2.04 | 2.62 E-16  | Mefv      | NM_019453    | N |
| 2.04 | 1.52 E-09  | Chl1      | NM_007697    | Y |
| 2.03 | 1.13 E-30  | Rnf36     | NM_080510    | N |
| 2.02 | 1.55 E-09  | Timp1     | NM_011593    | N |
| 2.01 | 6.05 E-06  | Dio2      | NM_010050    | Y |
| 2.01 | 1.12 E-10  | Sphk1     | NM_025367    | N |
| 2.01 | 0.00026    | Tnc       | NM_011607    | N |
| 2.01 | 7.95 E-06  | Ptx3      | NM_008987    | N |

**Table S3**

List of upregulated genes in lung tissue of *miR-223*<sup>-/-</sup> mice at day 21 post-infection.

---

| Gene name <sup>b</sup>        | Mouse genotype                | Lung tissue <sup>a</sup> |             |             |
|-------------------------------|-------------------------------|--------------------------|-------------|-------------|
|                               |                               | Day 7                    | Day 14      | Day 21      |
| <i>Imo2</i> <sup>(39)</sup>   | WT                            | 0.89 ± 0.11              | 1.00 ± 0.18 | 0.62 ± 0.26 |
|                               | <i>miR-223</i> <sup>-/-</sup> | 0.78 ± 0.11              | 0.81 ± 0.12 | 0.55 ± 0.42 |
| <i>mef2c</i> <sup>(24)</sup>  | WT                            | 1.26 ± 0.27              | 1.16 ± 0.07 | 0.46 ± 0.08 |
|                               | <i>miR-223</i> <sup>-/-</sup> | 1.24 ± 0.07              | 1.15 ± 0.13 | 0.35 ± 0.08 |
| <i>ikk-a</i> <sup>(26)</sup>  | WT                            | 0.72 ± 0.05              | 0.80 ± 0.10 | 0.53 ± 0.16 |
|                               | <i>miR-223</i> <sup>-/-</sup> | 0.84 ± 0.10              | 0.84 ± 0.09 | 0.39 ± 0.03 |
| <i>CEBP-b</i> <sup>(39)</sup> | WT                            | 0.34 ± 0.19              | 0.64 ± 0.32 | 0.58 ± 0.20 |
|                               | <i>miR-223</i> <sup>-/-</sup> | 0.61 ± 0.18              | 0.84 ± 0.68 | 0.89 ± 0.27 |

---

<sup>a</sup> Fold change value normalized using *Gapd* and compared to uninfected samples. Data are representative of 2 independent experiments with 5 animals/group.

<sup>b</sup> Predicted miR-223 target (see references)

#### Table S4

Transcriptional activity of known *miR-223* targets in lung tissue of C57BL/6 (WT) and *miR-223*<sup>-/-</sup> mice during TB. qRT-PCR of *Imo2*, *mef2c*, *ikka*, and *CEBP-β* in lung parenchyma at different time points during TB.



| <b>Primer name</b>      | <b>Primer sequence 5'→3'</b>                  |
|-------------------------|-----------------------------------------------|
| <b>CXCL2 3'UTR For</b>  | CTCGAG <sup>1</sup> gccttaagatacccactaaca     |
| <b>CXCL2 3'UTR Rev</b>  | GCGGCCGC <sup>2</sup> acatgaataaataaatgtgtcca |
| <b>CCL3 3'UTR For</b>   | CTCGAG <sup>1</sup> gagtcttgaggcagcgaggaacccc |
| <b>CCL3 3'UTR Rev</b>   | GCGGCCGC <sup>2</sup> gcatattattacttctctgg    |
| <b>IL6 3'UTR For</b>    | CTCGAG <sup>1</sup> tcggtatgcctaagcatatc      |
| <b>IL6 3'UTR Rev</b>    | GCGGCCGC <sup>2</sup> acattataaaaatacatcacaag |
| <b>CXCL9 3'UTR For</b>  | CTCGAG <sup>1</sup> agaccattactttaccaacaag    |
| <b>CXC9 3'UTR Rev</b>   | GCGGCCGC <sup>2</sup> gaatttagtcactttactga    |
| <b>CXCL10 3'UTR For</b> | CTCGAG <sup>1</sup> ctggagtgaagccacgcaca      |
| <b>CXCL10 3'UTR Rev</b> | GCGGCCGC <sup>2</sup> gtctcctaccaccccaacttct  |
| <b>CXCL2 mut 1</b>      | gggggtggggacacctaccugcagtcggatggct            |
| <b>CXCL2 mut 2</b>      | agccatccgactgcaggtaggtgtccccacccc             |
| <b>CCL3 mut 1</b>       | tgatgacaaagtcatgggctttcaaagtacaatagatgct      |
| <b>CCL3 mut 2</b>       | agcatctattgtacattgaaagcccatgactttgtcatca      |
| <b>IL6 mut 1</b>        | atgttgtctctacgaagcccggatagttgggacactatfff     |
| <b>IL6 mut 2</b>        | aaaatagtgccaactatccgggcttcgtagagaacaacat      |

<sup>1</sup> XhoI restriction sequence

<sup>2</sup> NotI restriction sequence

### **Table S5**

Primers used for generation of 3'-UTR luciferase reporter constructs.
